# Supplementary material
Source: publisher figshare collection journal article supplement (https://acs.figshare.com/ndownloader/files/4632445)
Supplement: Supplementary file 1 [file 4632445]

# **Exposure modeling of engineered nanoparticles in the environment**

Nicole C. Mueller and Bernd Nowack

Technology and Society Laboratory  
Empa - Materials Science & Technology  
Lerchenfeldstrasse 5  
CH - 9014 St. Gallen, Switzerland

Tel +41 (0)71 274 76 92

Fax +41-(0)71-274 78 62

nowack@empa.ch

## **Supporting Information**

Table S1: Derivation of the weighting factor “article” for the allocation of the nano-Ag volume to the product categories

|                                | First 40<br>products with<br>Google<br>(05/29/2007) | %     | Number of<br>products in<br>WWI (I)<br>(03/04/2007) | %     | Number of products in<br>www.products.ec21.com<br>(05/30/2007) | %     | Total<br>number | Average<br>% | Weighting<br>factor<br>"article" |
|--------------------------------|-----------------------------------------------------|-------|-----------------------------------------------------|-------|----------------------------------------------------------------|-------|-----------------|--------------|----------------------------------|
| Plastics                       | 11                                                  | 27.50 | 26                                                  | 38.81 | 31                                                             | 42.47 | 68              | 37.78        | 0.38                             |
| Metals                         | 2                                                   | 5.00  | 8                                                   | 11.94 | 21                                                             | 28.77 | 31              | 17.22        | 0.17                             |
| Cosmetics/<br>Supplements      | 9                                                   | 22.50 | 11                                                  | 16.42 | 8                                                              | 10.96 | 28              | 15.56        | 0.16                             |
| Sprays/Liquids for<br>cleaning | 6                                                   | 15.00 | 10                                                  | 14.93 | 4                                                              | 5.48  | 20              | 11.11        | 0.11                             |
| Textiles                       | 11                                                  | 27.50 | 12                                                  | 17.91 | 8                                                              | 10.96 | 31              | 17.22        | 0.17                             |
| Paint/Sealings                 | 1                                                   | 2.50  | 0                                                   | 0.00  | 1                                                              | 1.37  | 2               | 1.11         | 0.01                             |
| total                          | 40                                                  |       | 67                                                  |       | 73                                                             |       | 180             | 100          | 1.00                             |

Table S2: Derivation of the weighting factor “weight” for the allocation of the nano-Ag volume to the product categories

|                             | Mean weight of the articles in the category [g] | Mean concentration of the articles in the category [ $\mu\text{g/g}$ ] | Mean amount of nano-Ag per article [ $\mu\text{g}$ ] | % [weight] | Weighting factor „weight“ |
|-----------------------------|-------------------------------------------------|------------------------------------------------------------------------|------------------------------------------------------|------------|---------------------------|
| Plastics                    | 100                                             | 100                                                                    | 10000                                                | 0.88       | 0.0088                    |
| Metals                      | 50                                              | 100                                                                    | 5000                                                 | 0.44       | 0.0044                    |
| Cosmetics/Supplements       | 100                                             | 500                                                                    | 50000                                                | 4.41       | 0.044                     |
| Sprays/Liquids for cleaning | 500                                             | 100                                                                    | 50000                                                | 4.41       | 0.044                     |
| Textiles                    | 200                                             | 100                                                                    | 20000                                                | 1.76       | 0.017                     |
| Paint/Sealings              | 1000                                            | 1000                                                                   | 1000000                                              | 88.11      | 0.88                      |

Table S3: Derivation of the weighting factor “article” for the allocation of the nano-TiO<sub>2</sub> volume to the product categories*Derivation of the weighting factor “article”*

|                             | Google<br>(05/29/2007) | %     | Number of<br>products in<br>WWI (I)<br>(03/04/2007) | %     | Number of products in<br>www.products.ec21.com<br>(05/30/2007) | %     | Total<br>number | Average<br>% | Weighting<br>factor<br>“article” |
|-----------------------------|------------------------|-------|-----------------------------------------------------|-------|----------------------------------------------------------------|-------|-----------------|--------------|----------------------------------|
| Sporting goods/<br>plastics | 5                      | 23.81 | 8                                                   | 42.11 | 1                                                              | 14.29 | 14              | 29.79        | 0.30                             |
| Cosmetics/<br>Supplements   | 0                      | 0.00  | 6                                                   | 31.58 | 0                                                              | 0.00  | 6               | 12.77        | 0.13                             |
| Coatings/Cleaning/<br>paste | 8                      | 38.10 | 3                                                   | 15.79 | 4                                                              | 57.14 | 15              | 31.91        | 0.32                             |
| Energy                      | 0                      | 0.00  | 1                                                   | 5.26  | 0                                                              | 0.00  | 1               | 2.13         | 0.02                             |
| Metals                      | 8                      | 38.10 | 0                                                   | 0.00  | 2                                                              | 28.57 | 10              | 21.28        | 0.21                             |
| Paint                       | 0                      | 0.00  | 1                                                   | 0.00  | 0                                                              | 0.00  | 1               | 2.13         | 0.02                             |
| total                       | 21                     |       | 19                                                  |       | 7                                                              |       | 47              | 100          | 1.00                             |

Table S4: Derivation of the weighting factor “weight” for the allocation of the nano-TiO<sub>2</sub> volume to the product categories

|                             | Mean weight<br>of the articles<br>in the category<br>[g] | Mean concentration<br>of the articles in the<br>category [µg/g] | Mean<br>amount of<br>nano-Ag per<br>article [µg] | %<br>[weight] | Weighting<br>factor<br>„weight“ |
|-----------------------------|----------------------------------------------------------|-----------------------------------------------------------------|--------------------------------------------------|---------------|---------------------------------|
| Sporting goods/<br>plastics | 200                                                      | 300                                                             | 60000                                            | 0.42          | 0.004                           |
| Cosmetics/<br>Supplements   | 200                                                      | 20000                                                           | 4000000                                          | 28.30         | 0.28                            |
| Coatings/Cleaning/<br>paste | 200                                                      | 300                                                             | 60000                                            | 0.42          | 0.004                           |
| Energy                      | 100                                                      | 50000                                                           | 5000000                                          | 35.37         | 0.35                            |
| Metals                      | 50                                                       | 300                                                             | 15000                                            | 0.11          | 0.001                           |
| Paint                       | 1000                                                     | 10000                                                           | 10000000                                         | 70.75         | 0.71                            |

Table S5: Compilation of production volumes of nano-Ag from the literature

| <b>Specification</b>                                                                      | <b>Amount [t/a]</b> | <b>Source</b>          |
|-------------------------------------------------------------------------------------------|---------------------|------------------------|
| Amount produced/handled by 3 companies in Switzerland (particle size <1µm) in liquid form | 3.1                 | (2)                    |
| Imports of nano-Ag in paints to Switzerland                                               | 0.5                 | Burkhardt, Pers. Comm. |
| Amount produced by one company in Switzerland for sprays                                  | 0.003               | Koch, Pers. Comm.      |
| Production in Europe                                                                      | 110-130             | (3)                    |
| Worldwide                                                                                 | 0.1 - 1             | DiRienzo, Pers. Comm.  |
| Worldwide                                                                                 | 300 – 800           | Centonze, Pers. Comm.  |

Table S6: Compilation of production volumes of nano-TiO<sub>2</sub> from the literature

| <b>Specification</b>                                                                 | <b>Amount [t/a]</b> | <b>Source</b> |
|--------------------------------------------------------------------------------------|---------------------|---------------|
| nano-TiO <sub>2</sub> use/production by 6 companies in Switzerland (particles <1 µm) | 435                 | (2)           |
| Worldwide production in 2006-10                                                      | 5000                | (4)           |
| Worldwide production in 2011-14                                                      | >10'000             | (4)           |

Table S7: Compilation of production volumes of CNT from the literature

| <b>Specification</b>                                                        | <b>Amount<br/>(t/a)</b> | <b>Source</b> |
|-----------------------------------------------------------------------------|-------------------------|---------------|
| CNT production in Switzerland by one company                                | 1                       | (2)           |
| Production CNT by BASF 2009                                                 | 20                      | (5)           |
| Production CNT by BASF 2011                                                 | 500                     | (5)           |
| CNT production by the Carbon Nanotechnology Research Institute (Jp) in 2008 | 120                     | (6)           |
| MWCNT production by Hyperion                                                | 110                     | (7, 8)        |
| CNT production of 27 firms globally in 2004                                 | 108                     | (9)           |
| CNT production of 27 firms globally in 2009                                 | 1000                    | (9)           |
| Worldwide production in 2003                                                | 3                       | (6)           |
| SWCNT and MWCNT worldwide                                                   | 500                     | (6)           |
| SWCNT production capacity worldwide in 2005                                 | >27                     | (10)          |
| SWCNT production worldwide capacity in 2007                                 | 50                      | (10)          |
| SWCNT production capacity worldwide in 2008                                 | 100                     | (10)          |
| MWCNT production capacity worldwide 2004                                    | >99                     | (10)          |
| MWCNT production capacity worldwide 2007                                    | >268                    | (10)          |
| MWCNT production capacity worldwide 2008                                    | 375                     | (10)          |



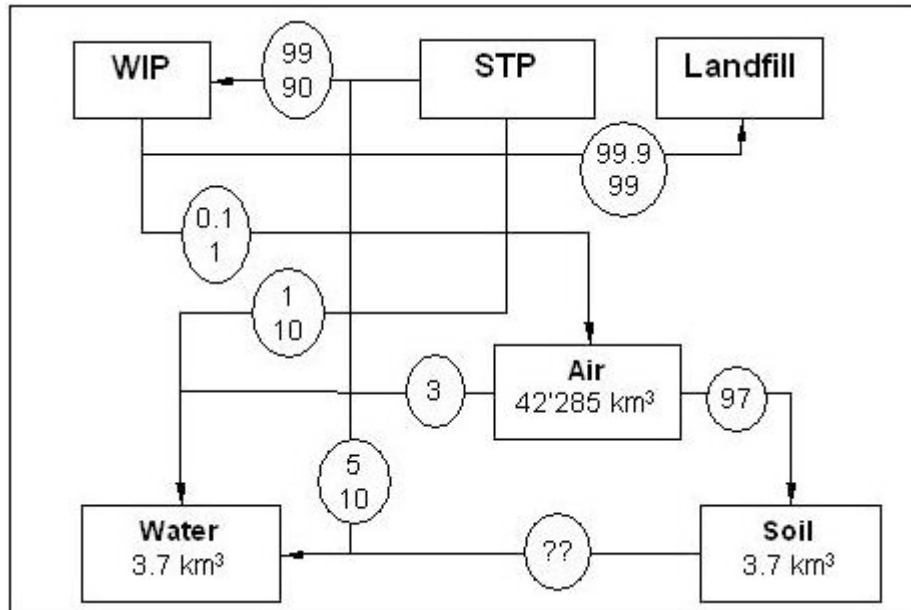

Figure S1: Overview over the flow coefficients (%) between the environmental compartments, WIP, STP and landfill. The upper number represents the coefficient used for the RE-scenario; the lower number is used in the HE-scenario. The dashed line from STP to the water compartment represents the fraction of the overflow discharge (untreated wastewater entering the water compartment).

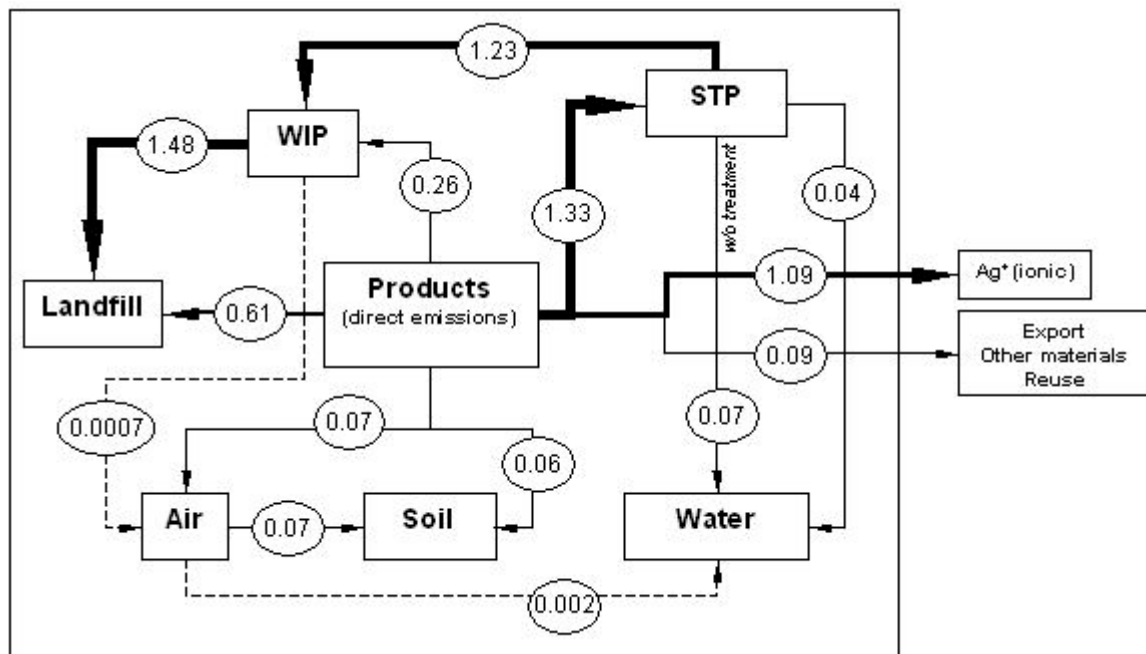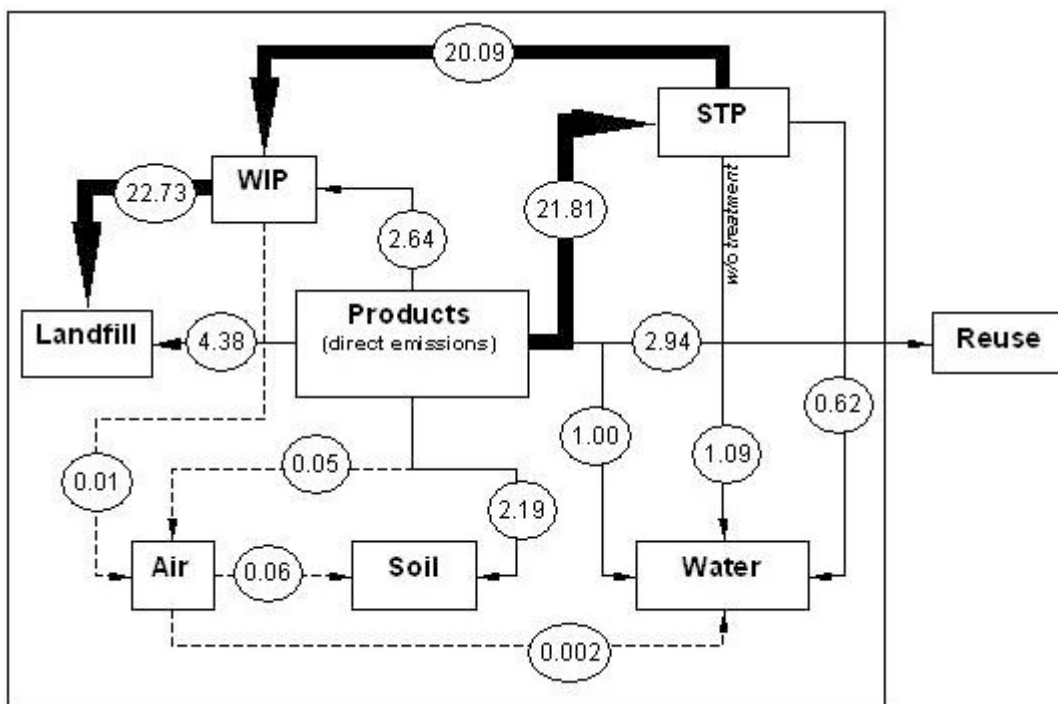

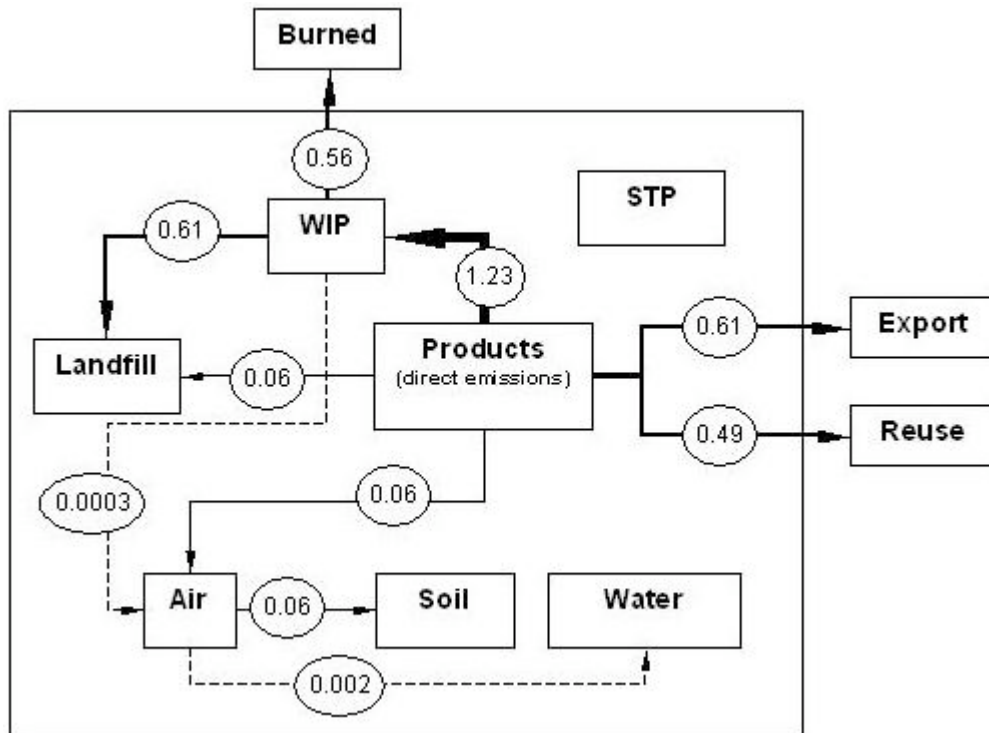

Figure S2: nano-Ag (a), nano-TiO<sub>2</sub> (b) and CNT (c) flows from the products to the different environmental compartments, WIP, STP and landfill (RE-scenario). All flows are in tons/year. The thickness of the arrows is proportional to the amount of silver flowing between the compartments. Dashed arrows represent the lowest volume.

## References

- (1) Woodrow Wilson Institute "Nanotechnology Consumer Product Inventory. <http://www.nanotechproject.org/index.php?id=44>," 2007.
- (2) Schmid, K.; Riediker, M. Use of nanoparticles in Swiss industry: A targeted survey. *Environ. Sci. Technol.* **2008**, in press.
- (3) Blaser, S. A.; Scheringer, M.; MacLeod, M.; Hungerbühler, K. Estimation of cumulative aquatic exposure and risk due to silver: Contribution of nano-functionalized plastics and textiles. *Sci. Total. Environ.* **2008**, 390, 396-409.
- (4) UNEP "Emerging Challenges - Nanotechnology and the Environment, Geo Yearbook 2007.," 2007.
- (5) Schmid, K.; Riediker, M.; Institut universitaire romand de santé au travail (IST), 2007.
- (6) Borm, P. J. A.; Robbins, D.; Haubold, S.; Kuhlbusch, T.; Fissan, H.; Donaldson, K.; Schins, R.; Stone, V.; Kreyling, W.; Lademann, J.; Krutmann, J.; Warheit, D.; Oberdorster, E. The potential risks of nanomaterials: a review carried out for ECETOC. *Particle Fiber Toxicol.* **2006**, 3, 11.
- (7) Service, R. F. Superstrong Nanotubes Show They Are Smart, Too. *Sci. Total. Environ.* **1998**, 281, 940-942.
- (8) Huczko, A.; Lange, H. Carbon nanotubes: Experimental evidence for a null risk of skin irritation and allergy. *Fullerene Sci. Technol.* **2001**, 9, 247-250.
- (9) Kuzma, J. "The Nanotechnology-Biology Interface: Exploring Models for Oversight, Center for Science, Technology, and Public Policy, Minneapolis, MN, 2005.," 2005.
- (10) Román, C.; Holister, P.; Harper, T. "Nanotubes," Cientifica, 2004.
